# Supplementary material for: Kinetic and DRIFTS studies of IrRu/Al2O3 catalysts for lean NOx reduction by CO at low temperature
Source: Royal Society of Chemistry journal article supplement (doi:10.1039/d0cy01835j), 2020-01-01
Supplement: d0cy01835j1.pdf [file d0cy01835j1.pdf]

## **Supporting Information**

### **Kinetic and DRIFTS Studies of IrRu/Al<sub>2</sub>O<sub>3</sub> Catalysts for Lean NO<sub>x</sub> Reduction by CO at Low Temperature**

Ji Hwan Song<sup>a</sup>, Dong Chan Park<sup>a</sup>, Young-Woo You<sup>b,c</sup>,  
Young Jin Kim<sup>b</sup>, Soo Min Kim<sup>b</sup>, Iljeong Heo<sup>b</sup>, Do Heui Kim<sup>\*,a</sup>

*<sup>a</sup>School of Chemical and Biological Engineering, Institute of Chemical Processes,  
Seoul National University, Seoul 08826, Republic of Korea*

*<sup>b</sup>Environment and Sustainable Resources Research Center,  
Chemical & Process Technology Division,  
Korea Research Institute of Chemical Technology, Daejeon 34114, Republic of Korea*

*<sup>c</sup>Department of Chemical and Biomolecular Engineering,  
Korea Advanced Institute of Science and Technology, Daejeon 34141, Republic of Korea*

**\*Corresponding author**

(Tel: +82-2-880-1633, Fax: +82-2-888-7295, E-mail: dohkim@snu.ac.kr)

**Table S1** Detailed values for NO conversion, CO conversion, NO<sub>2</sub> concentration, and N<sub>2</sub>O concentration over the catalyst series, with regard to reaction temperatures.

| Catalyst |                                      | Reaction temperature (°C) |      |      |      |      |      |      |      |
|----------|--------------------------------------|---------------------------|------|------|------|------|------|------|------|
|          |                                      | 150                       | 175  | 200  | 225  | 250  | 300  | 350  | 400  |
| Ir4Ru0   | NO conversion (%)                    | 4.1                       | 20.7 | 37.6 | 34.4 | 38.0 | 67.1 | 73.6 | 68.5 |
|          | CO conversion (%)                    | 0.8                       | 5.0  | 94.6 | 98.5 | 98.7 | 98.4 | 98.7 | 98.4 |
|          | NO <sub>2</sub> concentration (ppm)  | 0.2                       | 1.5  | 3.7  | 8.8  | 13.3 | 30.7 | 34.4 | 32.2 |
|          | N <sub>2</sub> O concentration (ppm) | 0.5                       | 1.4  | 2.4  | 1.6  | 1.2  | 0.9  | 1.0  | 0.7  |
| Ir3Ru1   | NO conversion (%)                    | 12.6                      | 60.9 | 76.7 | 68.0 | 62.7 | 88.6 | 87.6 | 73.8 |
|          | CO conversion (%)                    | 1.4                       | 42.7 | 97.0 | 98.5 | 98.7 | 98.6 | 98.7 | 98.7 |
|          | NO <sub>2</sub> concentration (ppm)  | 2.6                       | 2.8  | 3.5  | 5.8  | 9.3  | 31.0 | 34.1 | 33.3 |
|          | N <sub>2</sub> O concentration (ppm) | 1.2                       | 4.2  | 5.1  | 3.4  | 3.2  | 2.0  | 1.6  | 1.0  |
| Ir2Ru2   | NO conversion (%)                    | 19.3                      | 70.2 | 81.3 | 74.4 | 80.3 | 91.2 | 87.8 | 76.3 |
|          | CO conversion (%)                    | 3.0                       | 58.7 | 97.1 | 98.5 | 98.7 | 98.6 | 98.7 | 98.7 |
|          | NO <sub>2</sub> concentration (ppm)  | 0                         | 0    | 1.3  | 3.1  | 8.1  | 30.5 | 31   | 30.2 |
|          | N <sub>2</sub> O concentration (ppm) | 1.9                       | 5.1  | 5.6  | 3.9  | 3.7  | 2.2  | 1.4  | 1.3  |
| Ir1Ru3   | NO conversion (%)                    | 24.5                      | 76.5 | 87.4 | 92.1 | 89.1 | 90.3 | 85.4 | 71.5 |
|          | CO conversion (%)                    | 2.0                       | 52.6 | 89.8 | 94.6 | 98.6 | 98.8 | 98.5 | 98.7 |
|          | NO <sub>2</sub> concentration (ppm)  | 0                         | 0    | 0    | 3.2  | 26.8 | 44.7 | 41.7 | 34.3 |
|          | N <sub>2</sub> O concentration (ppm) | 2.5                       | 4.9  | 6.1  | 4.8  | 3.1  | 0.5  | 0.8  | 0.6  |
| Ir0Ru4   | NO conversion (%)                    | 0                         | 0    | 0.8  | 8.9  | 88.9 | 89.1 | 81.2 | 69.0 |
|          | CO conversion (%)                    | 0                         | 0.9  | 0    | 3.2  | 89.3 | 98.8 | 98.7 | 98.6 |
|          | NO <sub>2</sub> concentration (ppm)  | 2.2                       | 2    | 4.5  | 9.8  | 45.8 | 49.5 | 44.9 | 34.5 |
|          | N <sub>2</sub> O concentration (ppm) | 0.4                       | 0.3  | 0.1  | 0.3  | 0    | 0    | 0    | 0    |

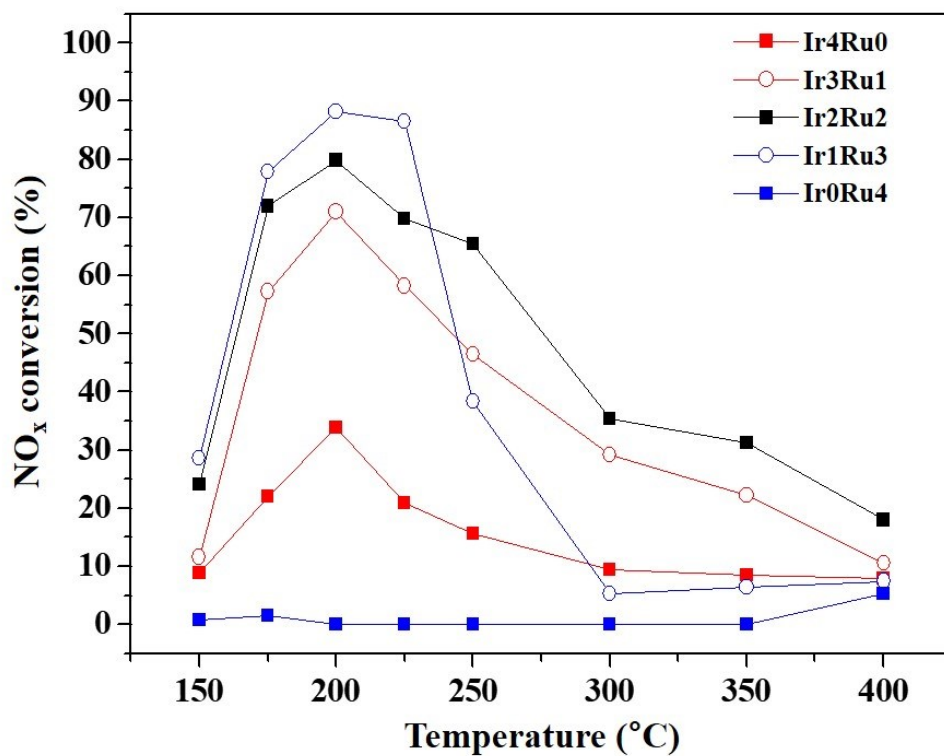

**Figure S1.** NO<sub>x</sub> conversion of the catalysts with regard to reaction temperatures. The catalysts were pretreated by flowing 10 % H<sub>2</sub>/N<sub>2</sub>, at 450 °C for 1 hour. Inlet feed was comprised of NO (50 ppm), CO (7000 ppm), and O<sub>2</sub> (5 %) balanced with N<sub>2</sub>. Contact time was set to 120,000 ml/h·g-catalyst. NO<sub>x</sub> conversions were calculated by the following equation.

$$\text{NO}_x \text{ conversion (\%)} = ([\text{NO}_x]_{\text{in}} - [\text{NO}_x]_{\text{out}}) / [\text{NO}_x]_{\text{in}} \times 100$$

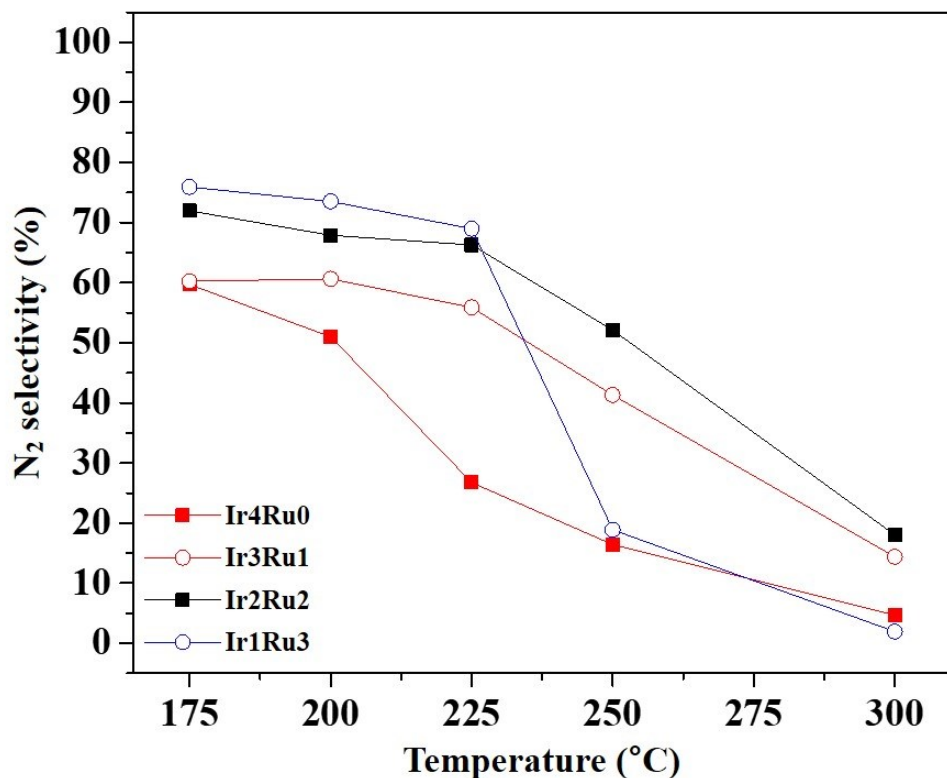

**Fig. S2.** N<sub>2</sub> selectivity of the catalyst series. Ir<sub>0</sub>Ru<sub>4</sub> sample is excluded from calculation due to its inert activity in NO reduction. Selectivity values over 175-300 °C is shown only, as selectivity values calculated in regions where diminished catalytic activity is exhibited may compromise the reliability of the calculated results. N<sub>2</sub> selectivity calculation was made by the following equation, assuming only N<sub>2</sub>, NO<sub>2</sub>, and N<sub>2</sub>O is formed as a result of NO conversion (NH<sub>3</sub> formation was not detected).

$$\text{N}_2 \text{ selectivity (\%)} = [\text{N}_2]_{\text{out}} / ([\text{N}_2]_{\text{out}} + [\text{NO}_2]_{\text{out}} + [\text{N}_2\text{O}]_{\text{out}}) \times 100$$

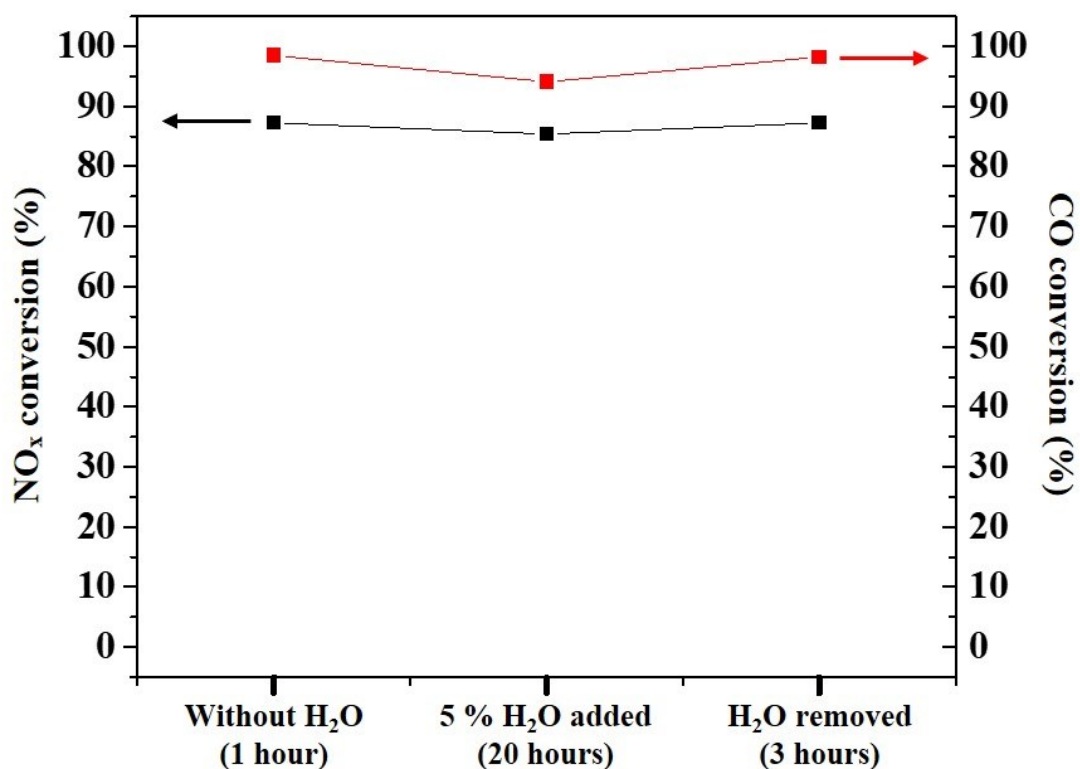

**Fig. S3.** Effect of adding H<sub>2</sub>O within the inlet feed on NO<sub>x</sub> and CO conversions of IrRu/Al<sub>2</sub>O<sub>3</sub> (Ir1Ru3) catalyst, where the catalytic activities were measured at 200 °C. After 1 hour of operation under dry conditions (50 ppm NO, 7000 ppm CO and 5 % O<sub>2</sub> balanced with N<sub>2</sub>), 5 % of H<sub>2</sub>O was added into the feed stream, and maintained for 20 hours, followed by another 3 hours after the removal of H<sub>2</sub>O. Pretreatment conditions and contact time were maintained the same with those of standard reaction tests.

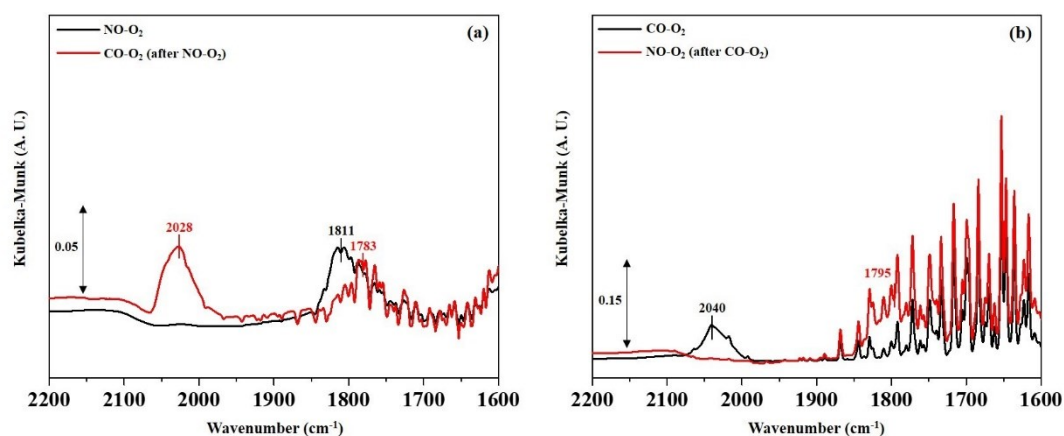

**Fig. S4.** DRIFTS spectra of Ir/Al<sub>2</sub>O<sub>3</sub> (Ir<sub>4</sub>Ru<sub>0</sub>) catalyst during the sequential adsorption of (a) 200 ppm NO and 5 % O<sub>2</sub> balanced with N<sub>2</sub> for 1 hour followed by 7000 ppm CO and 5 % O<sub>2</sub> balanced with N<sub>2</sub> for 1 hour, and (b) 7000 ppm CO and 5 % O<sub>2</sub> balanced with N<sub>2</sub> for 1 hour followed by 200 ppm NO and 5 % O<sub>2</sub> balanced with N<sub>2</sub> for 1 hour. During the analysis, the total flow rate and the adsorption temperature were kept to 50 ml/min and 150 °C, respectively. Each CO adsorption step was followed by 10 minutes of N<sub>2</sub> purging, to alleviate the interference of gas-phase CO bands.

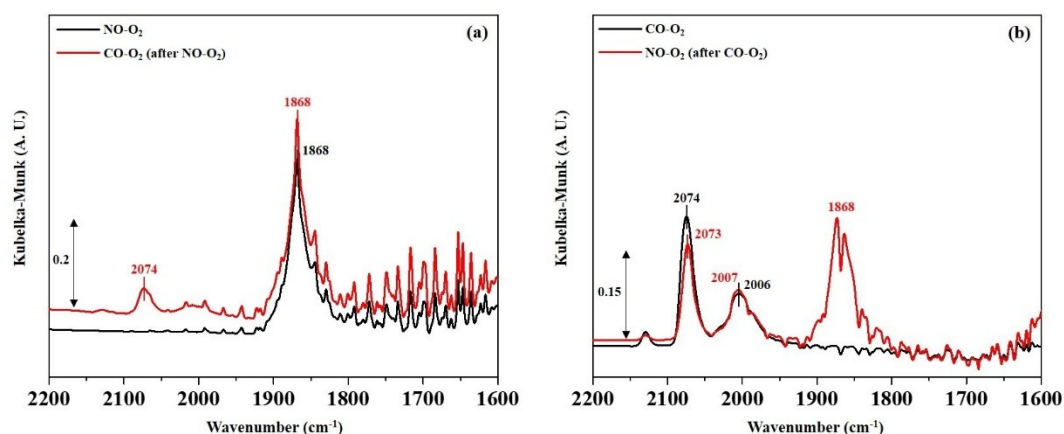

**Fig. S5.** DRIFTS spectra of Ru/Al<sub>2</sub>O<sub>3</sub> (Ir0Ru4) catalyst during the sequential adsorption of (a) 200 ppm NO and 5 % O<sub>2</sub> balanced with N<sub>2</sub> for 1 hour followed by 7000 ppm CO and 5 % O<sub>2</sub> balanced with N<sub>2</sub> for 1 hour, and (b) 7000 ppm CO and 5 % O<sub>2</sub> balanced with N<sub>2</sub> for 1 hour followed by 200 ppm NO and 5 % O<sub>2</sub> balanced with N<sub>2</sub> for 1 hour. During the analysis, the total flow rate and the adsorption temperature were kept to 50 ml/min and 150 °C, respectively. Each CO adsorption step was followed by 10 minutes of N<sub>2</sub> purging, to alleviate the interference of gas-phase CO bands.

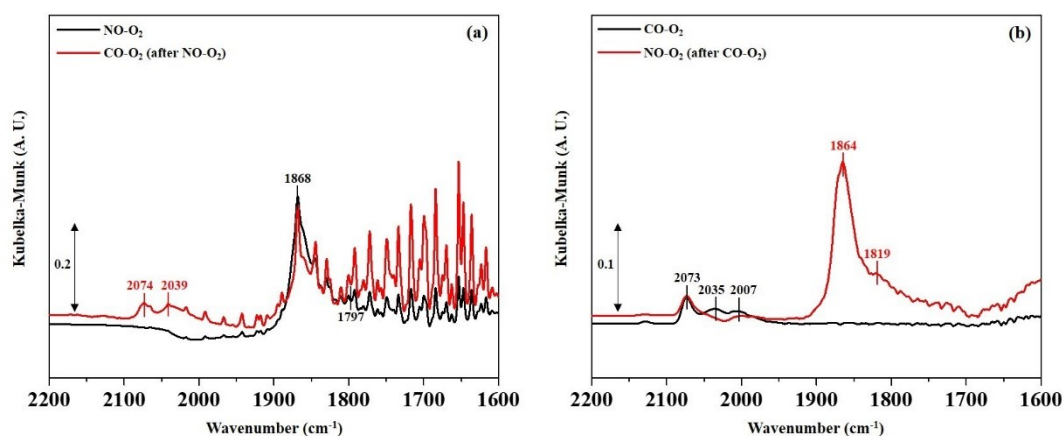

**Fig. S6.** DRIFTS spectra of IrRu/Al<sub>2</sub>O<sub>3</sub> (Ir1Ru3) catalyst during the sequential adsorption of (a) 200 ppm NO and 5 % O<sub>2</sub> balanced with N<sub>2</sub> for 1 hour followed by 7000 ppm CO and 5 % O<sub>2</sub> balanced with N<sub>2</sub> for 1 hour, and (b) 7000 ppm CO and 5 % O<sub>2</sub> balanced with N<sub>2</sub> for 1 hour followed by 200 ppm NO and 5 % O<sub>2</sub> balanced with N<sub>2</sub> for 1 hour. During the analysis, the total flow rate and the adsorption temperature were kept to 50 ml/min and 150 °C, respectively. Each CO adsorption step was followed by 10 minutes of N<sub>2</sub> purging, to alleviate the interference of gas-phase CO bands.



### Eley-Rideal mechanism assumption for surface O removal (CO oxidation)

After the dissociation of NO on the catalyst surface, when it is assumed that the surface O species is removed by CO through an Eley-Rideal mechanism, the overall scheme can be represented by the following equations (S1), (S2) and (S3).

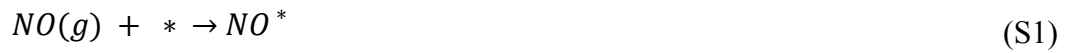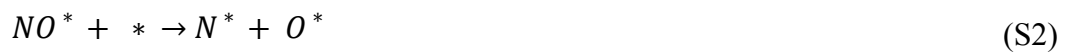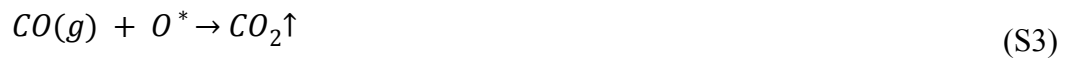

Considering equation (S3) as the rate limiting step, the rate law and the surface coverage for O species ( $\theta_O$ ) can be respectively written as equations (S4) and (S5), where  $k$ ,  $S_0$ , and  $K_i$  respectively represents the rate constant, total number of active sites, and  $k_{ads}/k_{des}$  for species  $i$ . It is assumed that the dissociation of the adsorbed NO species into N and O is facile.

$$r = kS_0\theta_O P_{CO} \quad (S4)$$

$$\theta_O = \frac{(K_{NO}P_{NO})^{1/2}}{1 + 2(K_{NO}P_{NO})^{1/2}} \quad (S5)$$

Substituting equation (S5) into equation (S4) yields equation (S6). From the analysis, Eley-Rideal mechanism of surface O removal by CO would result in positive reaction orders for both NO (between 0 and 0.5) and CO (first order of 1), which is inconsistent with the current kinetic results (Table 1).

$$r = kS_0 \frac{(K_{No}P_{No})^{1/2}}{1 + 2(K_{No}P_{No})^{1/2}} P_{Co} = k'P_{No}^x P_{Co}^1 \quad (0 < x < 1/2) \quad (S6)$$
